# Supplementary material for: Small-molecule inhibitor of intestinal anion exchanger SLC26A3 for treatment of hyperoxaluria and nephrolithiasis
Source: JCI journal article supplement (doi:10.1172/jci.insight.153359), 2022-05-24
Supplement: sd1 [file 1]

## **Supplementary Material Table of Contents**

Supplementary Figure 1. Effects of DRA<sub>inh</sub>-A270 on oxalate and fluorescein sulfonic acid (FSA) transport, and electrical resistance.

Supplementary Figure 2. Loop fluid volume in the intestinal oxalate absorption study, effects of DRA<sub>inh</sub>-A270 on mannitol transport, and urine oxalate and creatinine concentrations in the acute oxalate loading study.

Supplementary Figure 3. Urine oxalate and creatinine concentrations in the high-oxalate diet study.

Supplementary Figure 4. DRA<sub>inh</sub>-A270 selectivity against slc26a1 and slc26a2.

Supplementary Figure 5. DRA<sub>inh</sub>-A270 inhibition of human SLC26A3.

Supplementary Figure 6. Toxicity and off-target studies in mice.

Supplementary Figure 7. Oxalate standard curve in aqueous solution.

Supplementary Table 1. Eurofins SafetyScreen44 panel results for DRA<sub>inh</sub>-A270

Supplementary Table 2. CYP450 inhibition of DRA<sub>inh</sub>-A270 showing mean inhibition for each isoform.

Supplementary Table 3. hERG activity.

Supplementary Table 4. Microsomal stability of DRA<sub>inh</sub>-A270 in mouse, rat and human liver microsomes.

Supplementary Table 5. CBC, serum electrolytes, anion gap and chemistries in mice (on regular diet) treated with DRA<sub>inh</sub>-A270 (10 mg/kg) or vehicle twice daily for 7 days.

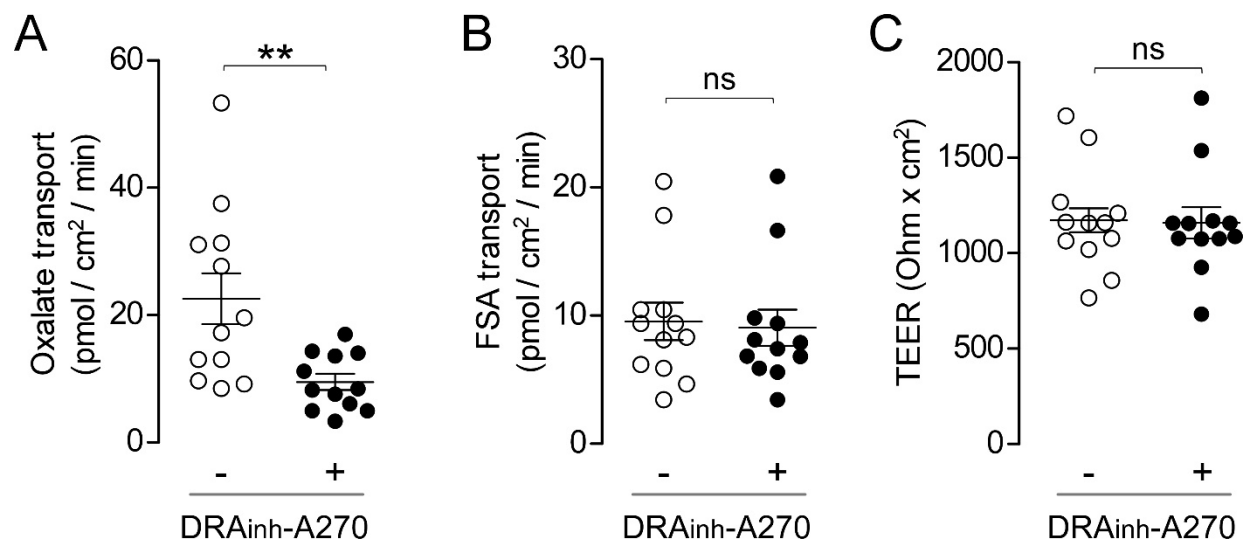

**Supplementary Figure 1. Effects of DRA<sub>inh</sub>-A270 on oxalate and fluorescein sulfonic acid (FSA) transport, and electrical resistance.** Oxalate (A) and FSA (B) transport rates in FRT cells expressing SLC26A3 (FRT-A3) pretreated with 10  $\mu$ M DRA<sub>inh</sub>-A270 (or DMSO control) for 15 min prior to application of a 500  $\mu$ M oxalate and 200  $\mu$ g/mL ( $\sim$ 420  $\mu$ M) FSA gradient (basolateral-to-apical), as shown in Fig. 1D. C. Transepithelial electrical resistance (TEER) in cells treated with 10  $\mu$ M DRA<sub>inh</sub>-A270 or DMSO control. Mean  $\pm$  S.E.M., n=12 wells per group. Student's t-test, \*\*p<0.01, ns: not significant.

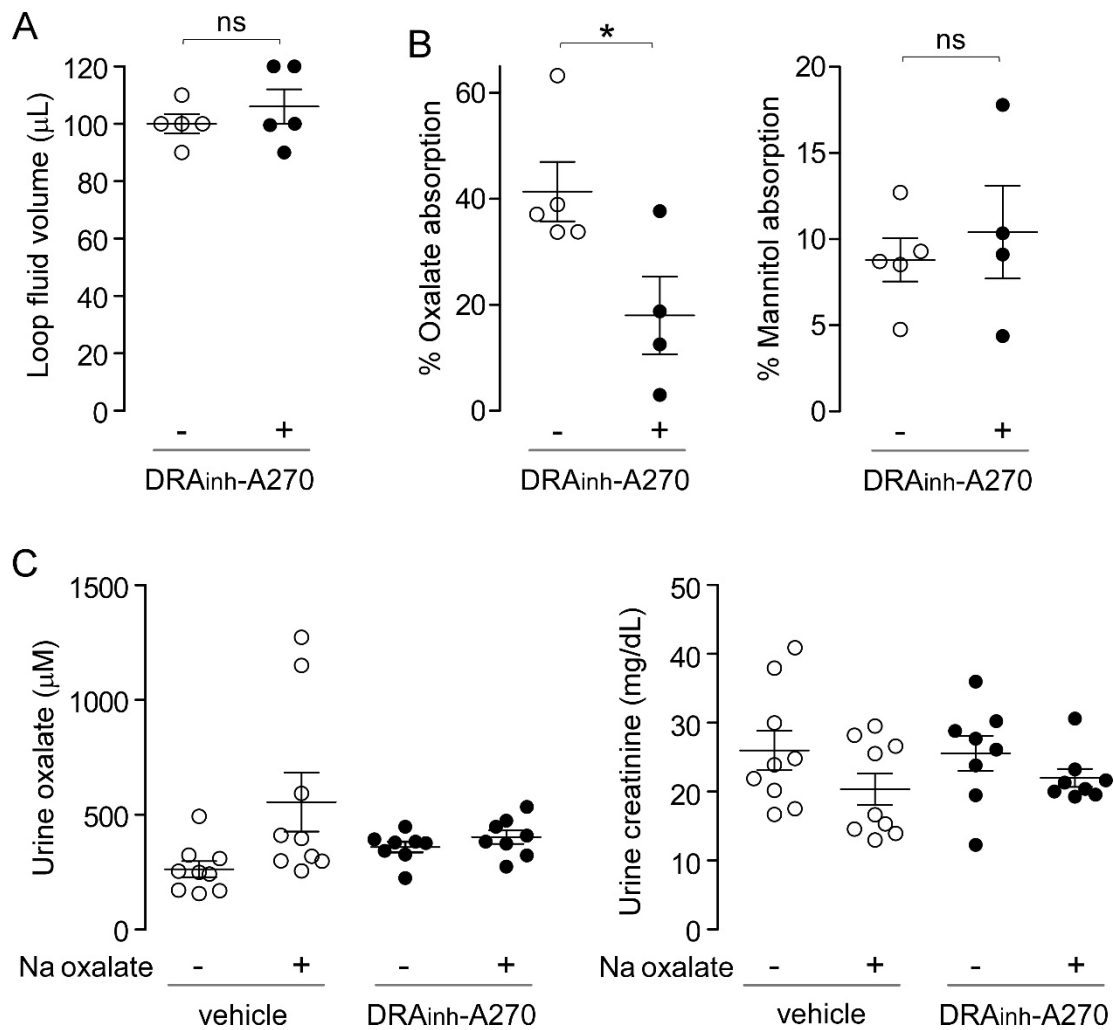

**Supplementary Figure 2. Loop fluid volume in the intestinal oxalate absorption study, effects of DRA<sub>inh</sub>-A270 on mannitol transport, and urine oxalate and creatinine concentrations in the acute oxalate loading study.** **A.** Loop fluid volume at 60 min in mouse distal colonic loops injected at 0 min with 100 μL of Cl<sup>-</sup>-free HEPES-buffered saline containing 500 μM sodium oxalate (+20 μM amiloride) with and without 10 μM DRA<sub>inh</sub>-A270. N=5 loops per group. **B.** Percentage absorption of luminal oxalate and mannitol (500 μM each, at 0 min) in mouse distal colonic loops at 60 min in the presence and absence of 10 μM DRA<sub>inh</sub>-A270. N=4-5 loops per group. **C.** Urine oxalate (left) and creatinine (right) concentration in mice (CD1 strain) before and after oral Na oxalate loading (2.5 μmol/kg) and treated with DRA<sub>inh</sub>-A270 (10 mg/kg, ip) or vehicle at the time of oxalate loading. N=8-9 mice per group. Mean ± S.E.M., Student's t-test, \*p<0.05, ns: not significant.

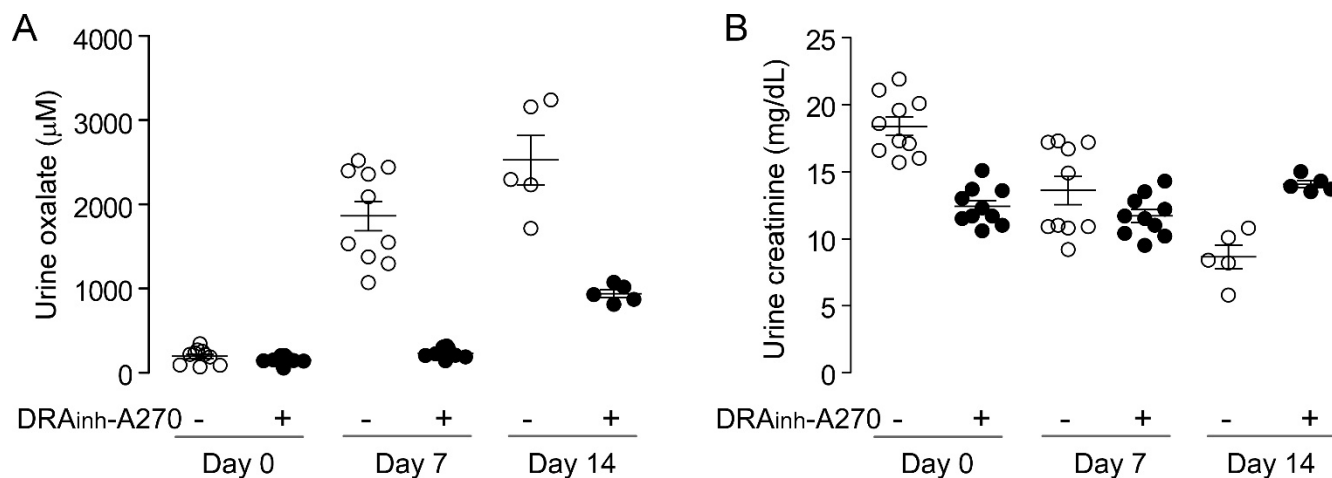

**Supplementary Figure 3. Urine oxalate and creatinine concentrations in the high-oxalate diet study.** **A.** Urine oxalate concentration in mice (C57BL/6 strain) on Days 0, 7 and 14 of the high-oxalate, low-calcium diet and treated with DRA<sub>inh</sub>-A270 (10 mg/kg, ip, BID) or vehicle. **B.** Urine creatinine concentration in mice on Days 0, 7 and 14 of the high-oxalate, low-calcium diet and treated with DRA<sub>inh</sub>-A270 (10 mg/kg, ip, BID) or vehicle. Mean  $\pm$  S.E.M., N=5-10 mice per group per time point.

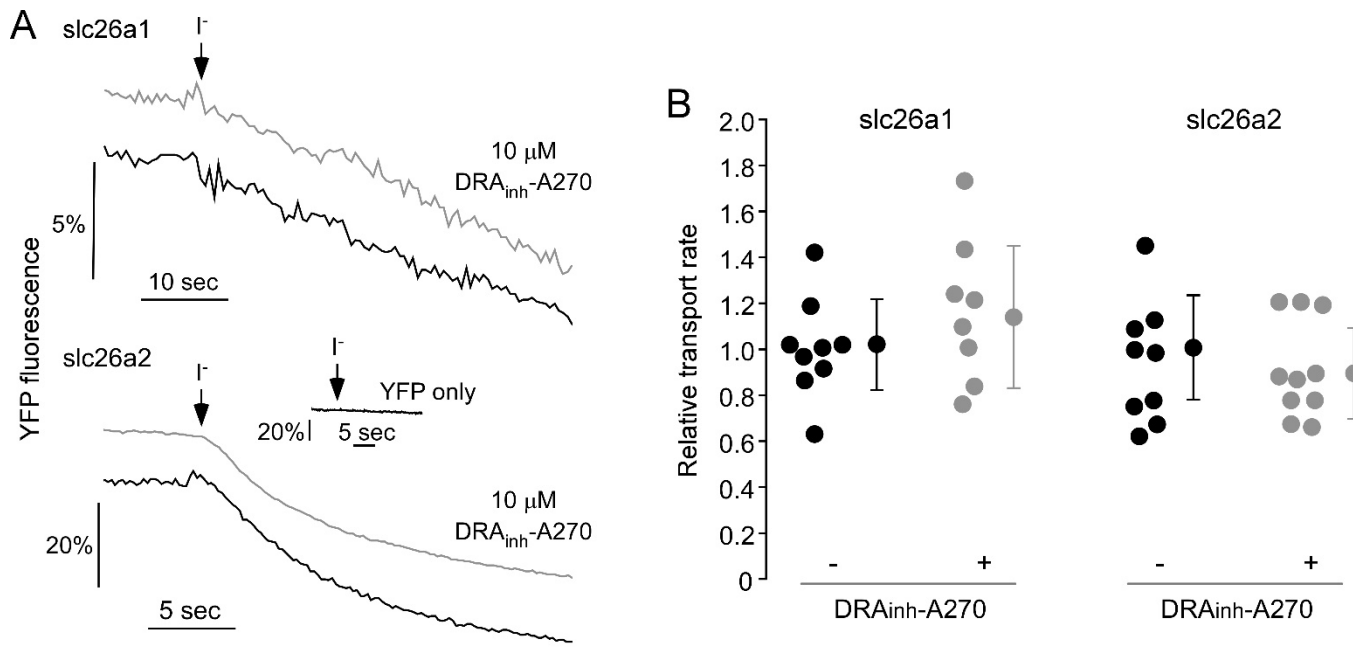

**Supplementary Figure 4.  $\text{DRA}_{\text{inh}}\text{-A270}$  selectivity against *slc26a1* and *slc26a2*.** **A.** 293 T/17 cells were transiently transfected with a plasmid to co-express *slc26a1* or *slc26a2* and a halide-sensitive YFP.  $\text{Cl}^-/\text{I}^-$  exchange activity shown without and with 10  $\mu\text{M}$   $\text{DRA}_{\text{inh}}\text{-A270}$ . **B.** Summary of relative transport activity for *slc26a1* and *slc26a2* without and with  $\text{DRA}_{\text{inh}}\text{-A270}$ .  $N=8\text{-}10$  experiments per condition, mean  $\pm$  S.E.M, differences not significant.

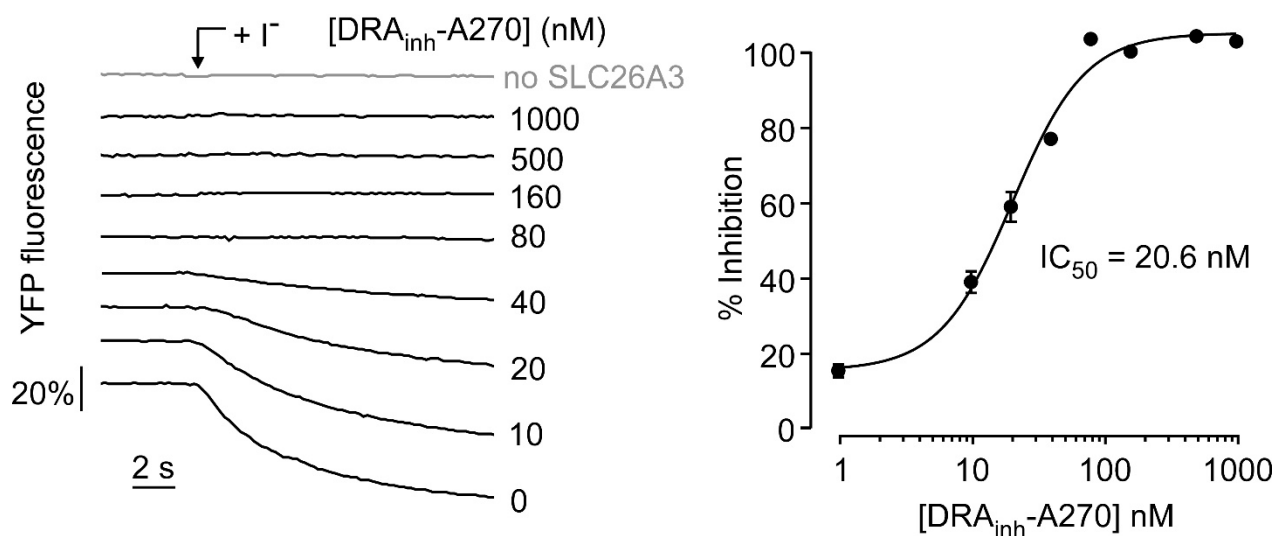

**Supplementary Figure 5. DRA<sub>inh</sub>-A270 inhibition of human SLC26A3.** (*left*) 93 T/17 cells were transiently transfected to co-express human SLC26A3 and a halide-sensitive YFP. YFP fluorescence shown as a measure of Cl<sup>-</sup>/I<sup>-</sup> exchange in the presence of indicated concentrations of DRA<sub>inh</sub>-A270. The top curve shows FRT-null cells as negative control. (*right*) Summary data for DRA<sub>inh</sub>-A270 inhibition of human SLC26A3. Mean ± S.E.M., n=10-32 cells per data point.

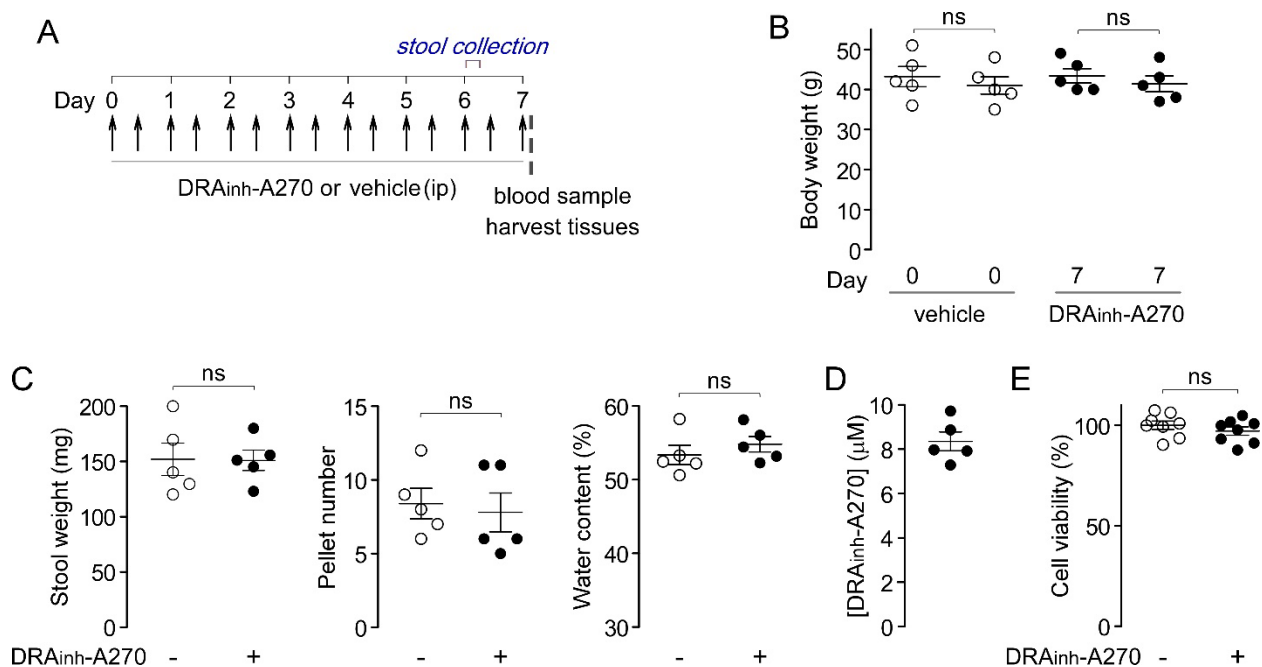

**Supplementary Figure 6. Toxicity and off-target studies in mice. A.** Experimental protocol.

**B.** Effect of 7-day DRA<sub>inh</sub>-A270 (10 mg/kg, ip, twice daily) or vehicle treatment on body weight, n=5 mice per group. **C.** 3-hour stool weight, pellet number and water content at Day 6 in mice treated with DRA<sub>inh</sub>-A270 or vehicle per panel A, n=5 mice per group. **D.** DRA<sub>inh</sub>-A270 concentration in plasma at 3 h after the final DRA<sub>inh</sub>-A270 dose in mice treated for 1 week as in A, n=5 mice. **E.** In vitro cytotoxicity of DRA<sub>inh</sub>-A270 (10 μM with 24 h incubation) measured by Alamar Blue assay in FRT cells, 0.1% DMSO was used as vehicle (negative) control. N=8 wells per group. As a positive control 20% DMSO reduced cell viability to 16±0.6 % (not shown). Mean ± S.E.M., unpaired t-test, ns: not significant.

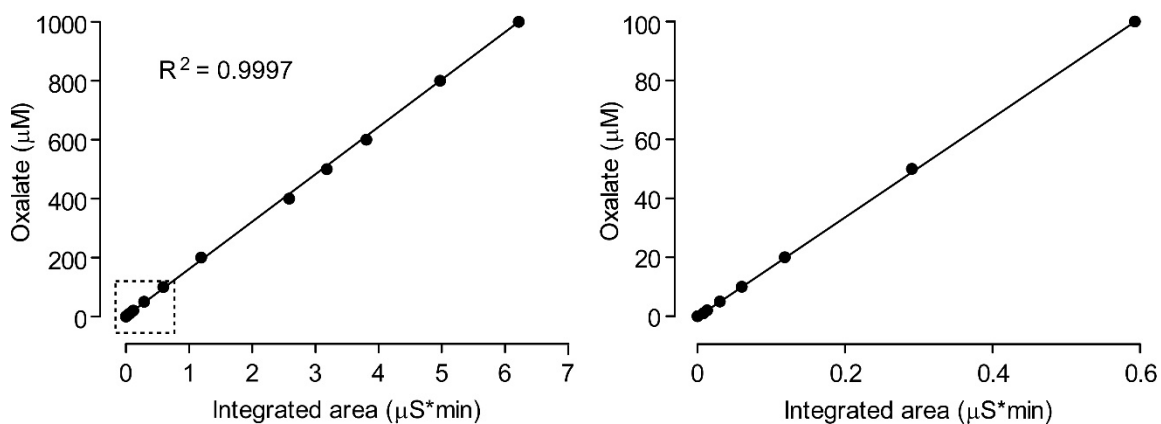

**Supplementary Figure 7. Oxalate standard curve in aqueous solution.** Integrated area of oxalate peak ( $\mu\text{S}\cdot\text{min}$ ) for aqueous solutions (phosphate-buffered saline) containing specified concentrations of sodium oxalate. The graph on the right is an expansion of the dashed rectangular area on the left.



**Supplementary Table 1.** Eurofins SafetyScreen44 panel results for DRA<sub>inh</sub>-A270. Assays were done in duplicate with 10 µM DRA<sub>inh</sub>-A270, mean % inhibition is shown.

| Assay name                                                                                              | Inhibition (%) |
|---------------------------------------------------------------------------------------------------------|----------------|
| 5-HT1A Human Serotonin GPCR Binding (Agonist Radioligand) Assay                                         | 0              |
| 5-HT1B Human Serotonin GPCR Binding (Antagonist Radioligand) Assay                                      | -1             |
| 5-HT2A Human Serotonin GPCR Binding (Antagonist Radioligand) Assay                                      | 17             |
| 5-HT2B Human Serotonin GPCR [ <sup>3</sup> H]LSD Binding (Agonist Radioligand) Assay                    | 64             |
| 5-HT3 Human Serotonin Ion Channel Binding (Antagonist Radioligand) Assay                                | -6             |
| A2A Human Adenosine GPCR Binding (Agonist Radioligand) Assay                                            | 46             |
| Acetylcholinesterase Human Enzymatic Assay                                                              | 10             |
| alpha1A Human Adrenoceptor GPCR Binding (Antagonist Radioligand) Assay                                  | 5              |
| alpha2A Human Adrenoceptor GPCR Binding (Antagonist Radioligand) Assay                                  | 47             |
| AR Human Androgen NHR Binding (Agonist Radioligand) Assay                                               | 13             |
| beta1 Human Adrenoceptor GPCR Binding (Antagonist Radioligand) Assay                                    | 14             |
| beta2 Human Adrenoceptor GPCR Binding (Antagonist Radioligand) Assay                                    | 3              |
| Cav1.2 (L-type) Rat Calcium Ion Channel Binding (Dihydropyridine Site) Assay                            | -6             |
| CB1 Human Cannabinoid GPCR Binding (Antagonist Radioligand) Assay                                       | -3             |
| CB2 Human Cannabinoid GPCR Binding (Agonist Radioligand) Assay                                          | -1             |
| CCK1 (CCKA) Human Cholecystokinin GPCR Binding (Agonist Radioligand) Assay                              | -5             |
| COX1 Human Cyclooxygenase Enzymatic Assay                                                               | -1             |
| COX2 Human Cyclooxygenase Enzymatic Assay                                                               | 15             |
| D1 Human Dopamine GPCR Binding (Antagonist Radioligand) Assay                                           | 13             |
| D2S Human Dopamine GPCR Binding (Antagonist Radioligand) Assay                                          | 2              |
| DAT Human Dopamine Transporter Binding (Antagonist Radioligand) Assay                                   | -2             |
| delta (DOP) Human Opioid GPCR Binding (Antagonist Radioligand) Assay                                    | -3             |
| ETA Human Endothelin GPCR Binding (Agonist Radioligand) Assay                                           | 13             |
| Glutamate (NMDA, Non-Selective) Rat Ion Channel [ <sup>3</sup> H] CGP-39653 Binding Assay               | 16             |
| GR Human Glucocorticoid NHR Binding (Agonist Radioligand) Assay                                         | -7             |
| H1 Human Histamine GPCR Binding (Antagonist Radioligand) Assay                                          | 27             |
| H2 Human Histamine GPCR Binding (Antagonist Radioligand) Assay                                          | -2             |
| hERG Human Potassium Ion Channel [ <sup>3</sup> H] Dofetilide Binding (Antagonist Radioligand) Assay    | 19             |
| kappa (KOP) Human Opioid GPCR Binding (Antagonist Radioligand) Assay                                    | 7              |
| KV (Non-Selective) Rat Potassium Ion Channel [ <sup>125</sup> I] alpha-Dendrotoxin Binding Assay        | -1             |
| M1 Human Acetylcholine (Muscarinic) GPCR Binding (Antagonist Radioligand) Assay                         | 9              |
| M2 Human Acetylcholine (Muscarinic) GPCR Binding (Antagonist Radioligand) Assay                         | -3             |
| M3 Human Acetylcholine (Muscarinic) GPCR Binding (Antagonist Radioligand) Assay                         | 8              |
| Monoamine Oxidase A (MAO-A) Human Enzymatic Assay                                                       | 73             |
| mu (MOP) Human Opioid GPCR Binding (Antagonist Radioligand) Assay                                       | -5             |
| nAChR (alpha4/beta2) Human Ion Channel Binding (Agonist Radioligand) Assay                              | -3             |
| NET Human Norepinephrine Transporter Binding (Antagonist Radioligand) Assay                             | 29             |
| Non-Selective Rat GABAA Ion Channel [ <sup>3</sup> H] Flunitrazepam Binding (Agonist Radioligand) Assay | -8             |
| Non-Selective Rat Sodium Ion Channel [ <sup>3</sup> H] Batrachotoxinin Binding (Site 2) Assay           | 22             |
| PDE3A Human Phosphodiesterase Enzymatic Assay                                                           | 4              |
| PDE4D2 Human Phosphodiesterase Enzymatic Assay                                                          | -2             |
| SET Human Serotonin Transporter Binding (Antagonist Radioligand) Assay                                  | -7             |
| V1A Human Vasopressin / Oxytocin GPCR Binding (Antagonist Radioligand) Assay                            | -1             |

**Supplementary Table 2.** CYP450 inhibition by DRA<sub>inh</sub>-A270 showing mean inhibition for each isoform. CYP450 activity was measured in human liver microsomes in the presence and absence of 10  $\mu$ M DRA<sub>inh</sub>-A270 (n=2 per condition). Substrates for each isoform: CYP1A2: phenacetin (30  $\mu$ M); CYP2C9: diclofenac (10  $\mu$ M); CYP2C19: S-mephenytoin (35  $\mu$ M); CYP3A4: midazolam (5  $\mu$ M) and testosterone (80  $\mu$ M); CYP2D6: bufuralol (10  $\mu$ M); CYP2C8: paclitaxel (10  $\mu$ M); CYP2B6: bupropion (70  $\mu$ M). Positive controls (reference) were: CYP1A2:  $\alpha$ -maphthoflavone; CYP2C9: sulfaphenazole; CYP2C19: omeprazole; CYP3A4: ketoconazole; CYP2D6: quinidine; CYP2C8: nicardipine; CYP2B6: clopidogrel.

| Compound                 | % of CYP inhibition (mean) |      |      |      |      |      |                    |                       |
|--------------------------|----------------------------|------|------|------|------|------|--------------------|-----------------------|
|                          | 1A2                        | 2B6  | 2C8  | 2C9  | 2C19 | 2D6  | 3A4<br>(midazolam) | 3A4<br>(testosterone) |
| Reference                | 100                        | 95.6 | 97.1 | 92.8 | 96   | 83.5 | 98.4               | 95.5                  |
| DRA <sub>inh</sub> -A270 | 11.4                       | 55.6 | 49.9 | 18.2 | 5.3  | 24.3 | -20.5              | -11.9                 |

**Supplementary Table 3.** hERG activity. hERG activity ( $n \geq 2$  per condition) was measured by manual patch-clamp in Chinese Hamster Ovary cells stably transfected with hERG. Cisapride (0.1  $\mu\text{M}$ ) was used as positive control Mean  $\pm$  S.D.,  $n=2-4$  experiments per group.

| Compound                 | % hERG inhibition |
|--------------------------|-------------------|
| DRA <sub>inh</sub> -A270 | 1.9 $\pm$ 4.6     |
| cisapride                | 93.9 $\pm$ 0.4    |

**Supplementary Table 4.** Microsomal stability of DRA<sub>inh</sub>-A270 in mouse, rat and human liver microsomes. DRA<sub>inh</sub>-A270 was incubated in the reaction mixture with NADPH for 0, 5, 15, 30 and 45 min at 37°C in duplicate with final liver microsomal protein concentration of 0.5 mg/mL. DRA<sub>inh</sub>-A270 concentration was measured at each time point by LC-MS/MS and in vitro elimination half-life was calculated. Ketanserin was used as the reference compound with rapid metabolism.

| Test compound            | Species | Percent remaining (%) |       |        |        |        | T <sub>1/2</sub> (minutes) |
|--------------------------|---------|-----------------------|-------|--------|--------|--------|----------------------------|
|                          |         | 0 min                 | 5 min | 15 min | 30 min | 45 min |                            |
| ketanserin               | human   | 100                   | 88.4  | 69.1   | 49.4   | 39.9   | 33.40                      |
|                          | rat     | 100                   | 68.9  | 36.5   | 16.1   | 6.9    | 11.86                      |
|                          | mouse   | 100                   | 82.1  | 54.4   | 30.8   | 19.5   | 18.94                      |
| DRA <sub>inh</sub> -A270 | human   | 100                   | 94.9  | 102.5  | 95.7   | 102.5  | ∞                          |
|                          | rat     | 100                   | 97.9  | 91.8   | 96.3   | 95.1   | 876.17                     |
|                          | mouse   | 100                   | 99.1  | 96.5   | 84.1   | 88.8   | 201.23                     |

**Supplementary Table 5.** CBC, serum electrolytes, anion gap and chemistries in mice (on regular diet) treated with DRA<sub>inh</sub>-A270 (10 mg/kg) or vehicle twice daily for 7 days. Mean  $\pm$  S.E.M., unpaired t-test, n=5 mice per group.

|                                       | <b>vehicle</b>  | <b>DRA<sub>inh</sub>-A270</b> | <b>P value</b> |
|---------------------------------------|-----------------|-------------------------------|----------------|
| Hemoglobin (g/dL)                     | 14.6 $\pm$ 0.1  | 14.8 $\pm$ 0.2                | >0.05          |
| Hematocrit (%)                        | 55.7 $\pm$ 0.4  | 56.8 $\pm$ 0.8                | >0.05          |
| WBC (10 <sup>3</sup> / $\mu$ L)       | 7.4 $\pm$ 1.2   | 6.6 $\pm$ 1.7                 | >0.05          |
| Platelets (10 <sup>3</sup> / $\mu$ L) | 739 $\pm$ 21    | 812 $\pm$ 36                  | >0.05          |
| Sodium (mmol/L)                       | 156.0 $\pm$ 0.5 | 154.6 $\pm$ 0.6               | >0.05          |
| Potassium (mmol/L)                    | 5.1 $\pm$ 0.4   | 4.8 $\pm$ 0.1                 | >0.05          |
| Chloride (mmol/L)                     | 118 $\pm$ 0.3   | 116 $\pm$ 0.7                 | >0.05          |
| Bicarbonate TCO <sub>2</sub> (mmol/L) | 15 $\pm$ 1.1    | 16 $\pm$ 1.0                  | >0.05          |
| Anion gap (mmol/L)                    | 22 $\pm$ 1.9    | 23 $\pm$ 1.6                  | >0.05          |
| Calcium (mg/dL)                       | 8.3 $\pm$ 0.1   | 8.4 $\pm$ 0.1                 | >0.05          |
| Phosphorus (mg/dL)                    | 7.2 $\pm$ 0.4   | 6.9 $\pm$ 0.4                 | >0.05          |
| Creatinine (mg/dL)                    | 0.04 $\pm$ 0.02 | 0.06 $\pm$ 0.02               | >0.05          |
| BUN (mg/dL)                           | 15 $\pm$ 0.9    | 13 $\pm$ 1.3                  | >0.05          |
| Total protein (g/dL)                  | 4.5 $\pm$ 0.02  | 4.4 $\pm$ 0.1                 | >0.05          |
| Albumin (g/dL)                        | 2.5 $\pm$ 0.04  | 2.4 $\pm$ 0.05                | >0.05          |
| Globulin (g/dL)                       | 2.0 $\pm$ 0.02  | 2.0 $\pm$ 0.04                | >0.05          |
| Total bilirubin (mg/dL)               | 0.3 $\pm$ 0.03  | 0.3 $\pm$ 0.03                | >0.05          |
| Bilirubin - unconjugated (mg/dL)      | 0.1 $\pm$ 0     | 0.08 $\pm$ 0.2                | >0.05          |
| Bilirubin - conjugated (mg/dL)        | 0.20 $\pm$ 0.03 | 0.22 $\pm$ 0.02               | >0.05          |
| Glucose (mg/dL)                       | 175 $\pm$ 7.8   | 156 $\pm$ 9.7                 | >0.05          |
| ALT (U/L)                             | 56 $\pm$ 14     | 40 $\pm$ 7                    | >0.05          |
| AST (U/L)                             | 83 $\pm$ 4      | 76 $\pm$ 11                   | >0.05          |
| ALP (U/L)                             | 65 $\pm$ 5      | 70 $\pm$ 4                    | >0.05          |
| Creatine kinase (U/L)                 | 603 $\pm$ 72    | 431 $\pm$ 96                  | >0.05          |
| Cholesterol (mg/dL)                   | 112 $\pm$ 5     | 98 $\pm$ 10                   | >0.05          |
